# Supplementary material
Source: MDPI journal article supplement (https://www.mdpi.com/2073-4395/13/5/1289)
Supplement: s1 [file s1]

| Visible Vegetation Indices |      |       |      |      |        |        |       |       |        |       |        |        |
|----------------------------|------|-------|------|------|--------|--------|-------|-------|--------|-------|--------|--------|
| Date                       | Zone | ExB   | ExG  | ExGR | ExR    | GLI    | IKAW  | MGRVI | NGRDI  | RGBVI | VARI   | WI     |
| 5/12/2021                  | 1    | -83.5 | 102  | 78.7 | 23.4   | 0.333  | 0.744 | 0.138 | 0.0693 | 0.793 | 0.0739 | -4.09  |
|                            | 2    | -93.7 | 115  | 89.7 | 24.9   | 0.0339 | 0.757 | 0.144 | 0.0726 | 0.808 | 0.0772 | -7.32  |
|                            | 3    | -91.0 | 111  | 84.9 | 26.4   | 0.338  | 0.769 | 0.139 | 0.0699 | 0.807 | 0.0732 | -19.2  |
|                            | 4    | -84.1 | 105  | 83.7 | 21.1   | 0.335  | 0.716 | 0.156 | 0.0784 | 0.784 | 0.0850 | -6.19  |
|                            | Mean | -87.1 | 107  | 83.2 | 23.7   | 0.335  | 0.744 | 0.143 | 0.0720 | 0.797 | 0.0769 | -6.93  |
| 6/1/2021                   | 1    | -85.8 | 113  | 107  | 6.91   | 0.400  | 0.764 | 0.274 | 0.140  | 0.857 | 0.149  | -3.76  |
|                            | 2    | -97.6 | 129  | 117  | 11.4   | 0.379  | 0.728 | 0.247 | 0.126  | 0.826 | 0.135  | -4.03  |
|                            | 3    | -99.7 | 130  | 117  | 12.5   | 0.382  | 0.749 | 0.242 | 0.123  | 0.840 | 0.132  | -4.19  |
|                            | 4    | -88.0 | 116  | 108  | 8.66   | 0.388  | 0.740 | 0.260 | 0.133  | 0.840 | 0.142  | -3.90  |
|                            | Mean | -90.8 | 120  | 111  | 9.00   | 0.390  | 0.748 | 0.261 | 0.133  | 0.844 | 0.142  | -3.90  |
| 6/29/21                    | 1    | -95.6 | 119  | 97.8 | 21.0   | 0.355  | 0.770 | 0.171 | 0.0866 | 0.826 | 0.0915 | -5.95  |
|                            | 2    | -97.1 | 123  | 106  | 16.8   | 0.368  | 0.773 | 0.197 | 0.0994 | 0.841 | 0.106  | -5.02  |
|                            | 3    | -98.5 | 123  | 105  | 18.1   | 0.369  | 0.789 | 0.191 | 0.0963 | 0.850 | 0.102  | -5.25  |
|                            | 4    | -93.7 | 116  | 83.9 | 31.6   | 0.317  | 0.716 | 0.123 | 0.0619 | 0.754 | 0.065  | -8.01  |
|                            | Mean | -95.9 | 120  | 97.9 | 21.7   | 0.352  | 0.762 | 0.170 | 0.0861 | 0.818 | 0.091  | -6.04  |
| 5/10/22                    | 1    | -8.90 | 82.4 | 64.5 | 18.0   | 0.157  | 0.086 | 0.230 | 0.117  | 0.309 | 0.185  | -1.67  |
|                            | 2    | -5.92 | 82.2 | 59.2 | 23.1   | 0.146  | 0.086 | 0.208 | 0.105  | 0.288 | 0.168  | -1.70  |
|                            | 3    | -12.4 | 85.0 | 69.2 | 15.8   | 0.162  | 0.091 | 0.234 | 0.119  | 0.319 | 0.188  | -1.64  |
|                            | 4    | -7.49 | 78.2 | 55.3 | 22.9   | 0.147  | 0.095 | 0.202 | 0.102  | 0.291 | 0.161  | -0.441 |
|                            | Mean | -8.22 | 81.8 | 61.8 | 20.0   | 0.153  | 0.088 | 0.219 | 0.111  | 0.301 | 0.176  | -1.43  |
| 5/17/22                    | 1    | -16.9 | 105  | 100  | 4.23   | 0.186  | 0.066 | 0.302 | 0.155  | 0.360 | 0.246  | -1.33  |
|                            | 2    | -18.1 | 109  | 104  | 4.22   | 0.189  | 0.068 | 0.306 | 0.157  | 0.366 | 0.247  | -1.36  |
|                            | 3    | -22.4 | 108  | 103  | 4.97   | 0.193  | 0.087 | 0.298 | 0.153  | 0.375 | 0.237  | -1.46  |
|                            | 4    | -12.6 | 97.6 | 85.3 | 12.3   | 0.170  | 0.074 | 0.265 | 0.136  | 0.332 | 0.215  | -1.49  |
|                            | Mean | -16.9 | 81.8 | 99.0 | 5.90   | 0.184  | 0.070 | 0.295 | 0.151  | 0.358 | 0.239  | -1.39  |
| 5/27/22                    | 1    | -18.6 | 111  | 112  | -0.682 | 0.196  | 0.056 | 0.329 | 0.169  | 0.378 | 0.269  | -1.26  |
|                            | 2    | -22.7 | 117  | 121  | -4.25  | 0.207  | 0.060 | 0.347 | 0.179  | 0.398 | 0.282  | -1.29  |
|                            | 3    | -25.9 | 118  | 125  | -6.14  | 0.215  | 0.066 | 0.358 | 0.185  | 0.414 | 0.288  | -1.27  |
|                            | 4    | -17.2 | 114  | 113  | 0.709  | 0.196  | 0.055 | 0.329 | 0.170  | 0.376 | 0.268  | -1.27  |
|                            | Mean | -14.2 | 79.7 | 81.2 | -1.42  | 0.201  | 0.058 | 0.338 | 0.174  | 0.388 | 0.275  | -1.26  |
| 6/2/2022                   | 1    | -22.3 | 110  | 116  | -5.66  | 0.213  | 0.057 | 0.360 | 0.186  | 0.408 | 0.292  | -1.24  |
|                            | 2    | -24.2 | 112  | 119  | -6.94  | 0.218  | 0.060 | 0.367 | 0.190  | 0.417 | 0.297  | -1.25  |
|                            | 3    | -26.9 | 110  | 119  | -8.66  | 0.228  | 0.069 | 0.378 | 0.197  | 0.436 | 0.302  | -1.28  |
|                            | 4    | -25.3 | 113  | 120  | -6.97  | 0.220  | 0.065 | 0.366 | 0.190  | 0.421 | 0.294  | -1.26  |
|                            | Mean | -23.8 | 111  | 118  | -6.56  | 0.217  | 0.061 | 0.365 | 0.189  | 0.416 | 0.295  | -1.25  |
| 6/7/2022                   | 1    | -15.1 | 113  | 115  | -2.67  | 0.192  | 0.036 | 0.340 | 0.176  | 0.372 | 0.286  | -1.18  |
|                            | 2    | -19.6 | 116  | 116  | -0.447 | 0.196  | 0.058 | 0.328 | 0.169  | 0.378 | 0.268  | -1.27  |
|                            | 3    | -20.8 | 113  | 114  | -0.371 | 0.198  | 0.064 | 0.328 | 0.169  | 0.384 | 0.267  | -1.30  |
|                            | 4    | -18.2 | 115  | 118  | -2.62  | 0.197  | 0.046 | 0.339 | 0.175  | 0.380 | 0.281  | -1.22  |
|                            | Mean | -17.5 | 114  | 116  | -1.84  | 0.195  | 0.047 | 0.336 | 0.173  | 0.376 | 0.278  | -1.22  |
| 6/15/2021                  | 1    | -12.5 | 105  | 108  | -2.15  | 0.189  | 0.032 | 0.337 | 0.173  | 0.365 | 0.283  | -1.15  |
|                            | 2    | -16.5 | 111  | 112  | -1.2   | 0.193  | 0.047 | 0.332 | 0.171  | 0.373 | 0.274  | -1.22  |
|                            | 3    | -17.5 | 109  | 106  | 2.85   | 0.189  | 0.061 | 0.312 | 0.160  | 0.366 | 0.255  | -1.32  |
|                            | 4    | -14.7 | 108  | 107  | 0.738  | 0.187  | 0.047 | 0.321 | 0.165  | 0.363 | 0.266  | -1.23  |
|                            | Mean | -14.5 | 108  | 108  | -0.74  | 0.189  | 0.042 | 0.329 | 0.170  | 0.367 | 0.274  | -1.20  |

Supplementary Data: Table of the computed visible vegetation indices of alfalfa from UAV imagery for each of the 4 zones on each of the 9 days the UAV was flown in Rexburg, ID 2021 and 2022.
